# Supplementary material for: Preparation of a microfibrous Fe/LTA zeolite membrane catalyst for acetone oxidation: effect of the preparation method
Source: Royal Society of Chemistry journal article supplement (doi:10.1039/d3nj01218b), 2023-01-01
Supplement: d3nj01218b1.pdf [file d3nj01218b1.pdf]

## Supporting Information

### Preparation of Microfibrous Fe/LTA Zeolite Membrane Catalyst for Acetone

#### Oxidation: Effect of Preparation Method

Chengzhi Hu, Changyan Zhou, Ying Yan\*,

*\*School of Chemistry and Chemical Engineering, South China University of Technology,*

*Guangzhou 510640, PR China*

---

\* Corresponding author: Tel: +86 2087111975; fax: +86 2087111975.  
E-mail address: [yingyan@scut.edu.cn](mailto:yingyan@scut.edu.cn) (Y. Yan).

## Text S1 Arrhenius equation and activation energy calculation

The reaction rate (racetone, mmol m<sup>-3</sup> s<sup>-1</sup>) was calculated by Eq (S1):

$$r_{\text{acetone}} = \frac{X_{\text{acetone}} \cdot V_{\text{acetone}}}{V_{\text{cat}}} \quad (\text{S1})$$

where  $V_{\text{cat}}$  represents the catalyst volume (m<sup>3</sup>),  $X_{\text{acetone}}$  is the conversion of acetone, and  $V_{\text{acetone}}$  is the acetone gas flow rate (mol s<sup>-1</sup>).

A dependence of the reaction rate ( $r_{\text{acetone}}$ ) on the products of CO<sub>2</sub> and H<sub>2</sub>O may be ignored and the empirical kinetic expression of the reaction rate equation of acetone oxidation can be described as Eq (S2),

$$r_{\text{acetone}} = A \exp\left(-\frac{E_a}{RT}\right) P_{\text{acetone}}^\alpha P_{\text{O}_2}^\beta \quad (\text{S2})$$

Taking the natural logarithm of Eq (S2), Eq (S3) can be obtained,

$$\ln r = \ln A + \alpha \ln P_{\text{acetone}} + \beta \ln P_{\text{O}_2} - E_a / (RT) \quad (\text{S3})$$

The components of the reactant gas feed undergo minor changes during the kinetics data testing. Therefore,  $\ln A$ ,  $\alpha \ln P_{\text{acetone}}$ , and  $\beta \ln P_{\text{O}_2}$  can be supposed to be approximately constant, and Eq (S3) can be simplified to Eq (S4),

$$\ln r = -\frac{E_a}{RT} + C \quad (\text{S4})$$

The apparent activation energy ( $E_a$ ) can be obtained from the slope of the resulting linear plot of  $\ln r$  versus  $1/RT$ .

Table S1 Comparison of catalytic combustion of acetone on Fe/LTA/PSSF and other catalysts

| Catalyst                                                               | concentration (ppm) | space velocity (h <sup>-1</sup> ) | T50 (°C) | T90 (°C) | Refs.     |
|------------------------------------------------------------------------|---------------------|-----------------------------------|----------|----------|-----------|
| Fe/LTA/PSSF-IM-3                                                       | 1500                | 13221                             | 208      | 230      | this work |
| Mn <sub>0.3</sub> Ti-NF                                                | 500                 | 360000                            | 260      | 290      | [1]       |
| 10V-TiC                                                                | 500                 | 72000                             | 230      | 292      | [2]       |
| Pt/BAsap                                                               | 600                 | 34000                             | 245      | /        | [3]       |
| V <sub>5</sub> Ti                                                      | 500                 | 360000                            | 270      | 300      | [4]       |
| Mn/GAmont-Zr                                                           | 600                 | 34000                             | 310      | 335      | [5]       |
| Pd <sub>0.01</sub> Mn <sub>0.2</sub> /Ti                               | 1000                | 30000(ml/g/h)                     | 205      | 259      | [6]       |
| La <sub>0.6</sub> Pb <sub>0.2</sub> Ca <sub>0.2</sub> MnO <sub>3</sub> | 1000                | 5100                              | 180      | 250      | [7]       |
| Ce <sub>0.8</sub> -Mn/AC                                               | 100                 | 1500                              | 175      | 245      | [8]       |
| Pt-Ce/TiO <sub>2</sub>                                                 | 1000                | /                                 | 210      | 236      | [9]       |

- [1] X. Zhu, S. Zhang, X. Yu, X. Zhu, C. Zheng, X. Gao, Z. Luo, K. Cen, Controllable synthesis of hierarchical MnO<sub>x</sub>/TiO<sub>2</sub> composite nanofibers for complete oxidation of low-concentration acetone, *Journal of Hazardous Materials*, 337 (2017) 105-114.
- [2] J. Chen, X. Yu, X. Zhu, C. Zheng, X. Gao, K. Cen, Electrospinning synthesis of vanadium-TiO<sub>2</sub>-carbon composite nanofibrous membranes as effective catalysts for the complete oxidation of low-concentration acetone, *Applied Catalysis A: General*, 507 (2015) 99-108.
- [3] A. Gil, M.A. Vicente, J.F. Lambert, L.M. Gandía, Platinum catalysts supported on Al-pillared clays, *Catalysis Today*, 68 (2001) 41-51.
- [4] X. Zhu, J. Chen, X. Yu, X. Zhu, X. Gao, K. Cen, Controllable synthesis of novel hierarchical V<sub>2</sub>O<sub>5</sub>/TiO<sub>2</sub> nanofibers with improved acetone oxidation performance, *RSC Advances*, 5 (2015) 30416-30424.
- [5] L.M. Gandía, M.A. Vicente, A. Gil, Complete oxidation of acetone over manganese oxide catalysts supported on alumina- and zirconia-pillared clays, *Applied Catalysis B: Environmental*, 38 (2002) 295-307.
- [6] Q. Zhao, Y. Ge, K. Fu, Y. Zheng, Q. Liu, C. Song, N. Ji, D. Ma, Catalytic performance of the Pd/TiO<sub>2</sub> modified with MnO<sub>x</sub> catalyst for acetone total oxidation, *Applied Surface Science*, 496 (2019).
- [7] N. Rezlescu, E. Rezlescu, P. Dorin Popa, C. Doroftei, M. Ignat, Some nanograined ferrites and perovskites for catalytic combustion of acetone at low temperature, *Ceramics International*, 41 (2015) 4430-4437.
- [8] T. Li, Z. Wang, Y. Shi, X. Yao, Preparation and Performance of Carbon-Based Ce-Mn Catalysts for

Efficient Degradation of Acetone at Low Temperatures, *Int J Environ Res Public Health*, 19 (2022).

[9] Y. Ge, K. Fu, Q. Zhao, N. Ji, C. Song, D. Ma, Q. Liu, Performance study of modified Pt catalysts for the complete oxidation of acetone, *Chemical Engineering Science*, 206 (2019) 499-506.
